# Supplementary material
Source: PubMed Central journal article supplement (PMC5736442)
Supplement: NIHMS915205-supplement-1.pdf [file NIHMS915205-supplement-1.pdf]

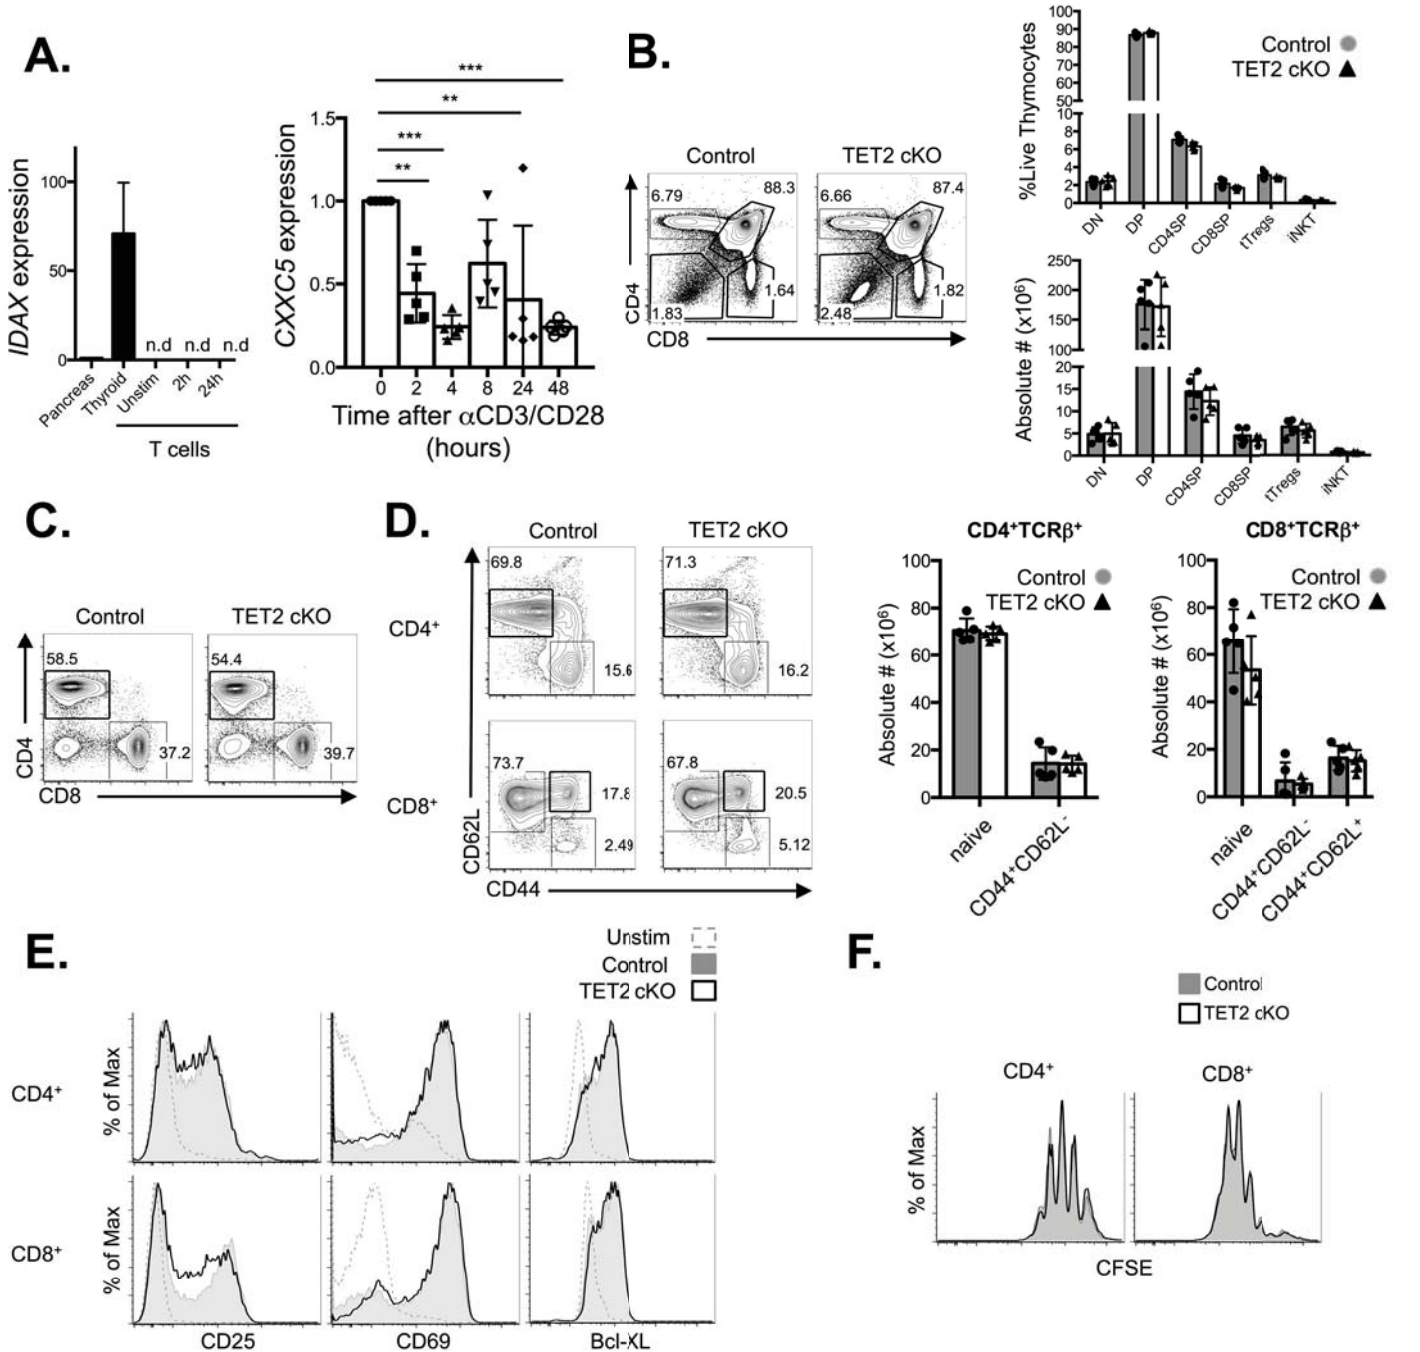

**Supplementary Figure 1.** TET2<sup>fl/fl</sup> CD4Cre<sup>+</sup> mice have intact thymic and peripheral T cell subsets. **A)** Expression of IDAX and CXXC5, relative to  $\beta$ -actin, in cDNA isolated from indicated WT tissues (IDAX) or T lymphocytes (IDAX, CXXC5). IDAX expression normalized to pancreatic cells and CXXC5 expression normalized to unstimulated T cells. n.d., not detected. **B) Left,** flow cytometric analysis of CD4 and CD8 expression on live thymocytes from control and TET2<sup>fl/fl</sup> CD4Cre<sup>+</sup> mice (TET2 cKO), aged 6-8wks. **Right,** Frequency and absolute numbers of thymocyte subsets among live thymocytes from control and TET2 cKO mice. **C)** Flow cytometric analysis of CD4 and CD8 expression on live TCR $\beta$ <sup>+</sup> splenocytes from control and TET2 cKO mice, aged 6-8wks. **D) Left,** flow cytometric analysis of CD44 and CD62L expression on CD4<sup>+</sup> and CD8<sup>+</sup> TCR $\beta$ <sup>+</sup> splenocytes; **right,** absolute number of indicated populations per spleen. **E)** Flow cytometric analysis of CD25, CD69 and intracellular Bcl-XL expression in CD4<sup>+</sup> and CD8<sup>+</sup> splenocytes stimulated overnight with 0.005mg/ml soluble anti-CD3. **F)** Representative flow cytometric analysis of CFSE dilution in CD4<sup>+</sup> and CD8<sup>+</sup> splenocytes stimulated with 0.1mg/ml soluble anti-CD3 for 3 days. \*\* $p < 0.01$ , \*\*\* $p < 0.001$ , two-way ANOVA with Dunnett's multiple comparisons. Data representative of  $n=5$ , 2 independent experiments (A),  $n=5$ /genotype, 2 independent experiments (B-F).

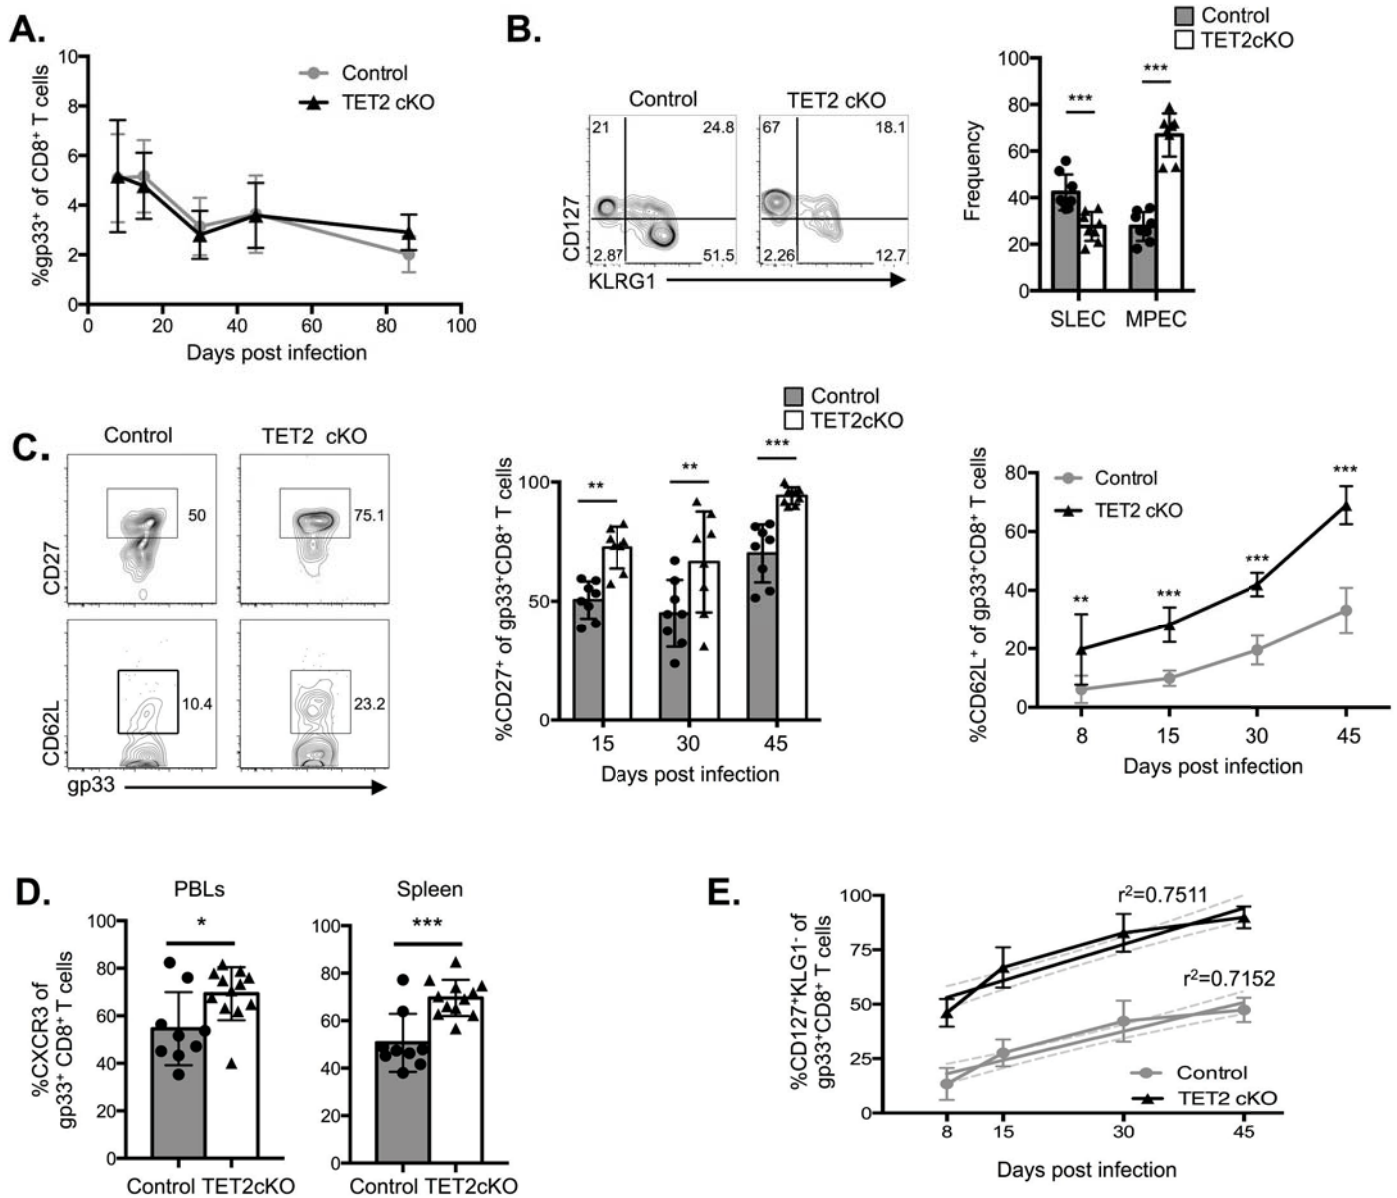

**Supplementary Figure 2** TET2 loss enhances memory CD8<sup>+</sup> T cell differentiation. Control and TET2 cKO mice were infected with LCMV-Armstrong and the phenotype of gp33<sup>+</sup> CD8<sup>+</sup> T cells isolated from peripheral blood were serially monitored over time. **A)** Frequency of gp33<sup>+</sup> among CD8<sup>+</sup> T cells in PBMCs at indicated time points. **B) Left,** flow plots of KLRG1 and CD127 expression on gp33<sup>+</sup>CD8<sup>+</sup>TCRb<sup>+</sup> PBMCs. **Right,** frequency of CD127<sup>+</sup>KLRG1<sup>-</sup> population among gp33<sup>+</sup>CD8<sup>+</sup>TCRb<sup>+</sup> PBMCs on day 15 p.i. **C) Left,** representative flow plots of CD27 and CD62L on gp33<sup>+</sup>CD8<sup>+</sup>TCRb<sup>+</sup> PBMCs on D15p.i. **Middle,** frequency of CD27<sup>+</sup> cells among gp33<sup>+</sup>CD8<sup>+</sup>TCRβ<sup>+</sup> PBMCs on indicated days following LCMV-Armstrong infection. **Left,** frequency of CD62L<sup>+</sup> cells among gp33<sup>+</sup>CD8<sup>+</sup>TCRβ<sup>+</sup> PBMCs on indicated days. **D)** Frequency of CXCR3<sup>+</sup> cells among gp33<sup>+</sup> CD8<sup>+</sup>TCRβ<sup>+</sup> PBMCs and splenocytes on D8 p.i. LCMV-Armstrong. **E)** Linear regression analysis of MPEC (CD127<sup>+</sup>KLRG1<sup>-</sup>) population among gp33<sup>+</sup> CD8<sup>+</sup> T cells in control and TET2 cKO mice following LCMV infection (p=0.15). Data representative of n=8/genotype, 2 independent experiments (A-C) or n=9/control and 12/TET2cKO, 3 independent experiments (D). \*p<0.05, \*\*p<0.01, \*\*\*p<0.001, unpaired t-test.

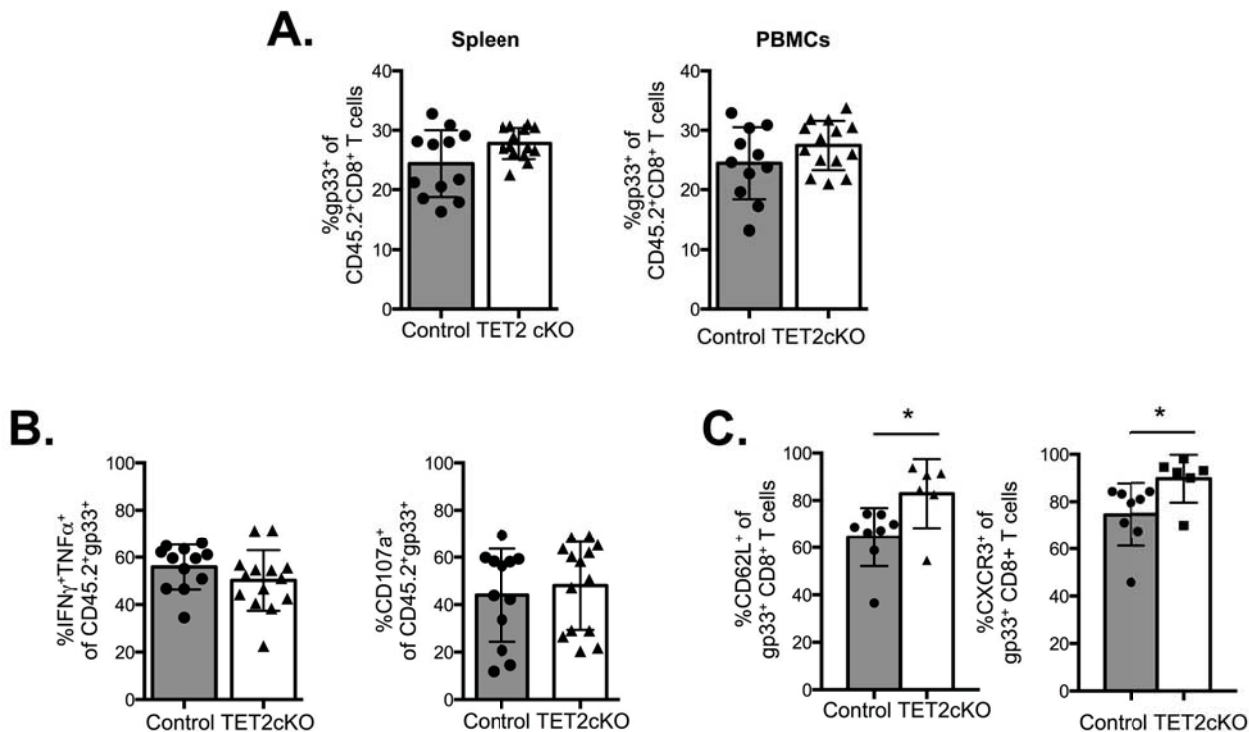

**Supplementary Figure 3.** TET2-deficient memory CD8<sup>+</sup> T cells have functional recall responses. Equal numbers of gp33<sup>+</sup>CD8<sup>+</sup> T cells from LCMV-Armstrong immune control and TET2cKO mice were transferred into congenic hosts, which were subsequently infected with LM-gp33. Gp33-specific memory responses were assessed five days later. **A)** Frequency of transferred gp33<sup>+</sup> of CD8<sup>+</sup>TCR $\beta$ <sup>+</sup> splenocytes and PBMCs. **B)** Frequency of indicated cell populations in CD8<sup>+</sup> splenocytes stimulated *ex vivo* with gp33 peptide for 5hrs. **C)** Frequency of CD62L<sup>+</sup> (*left*) or CXCR3<sup>+</sup> (*right*) of gp33<sup>+</sup> CD8<sup>+</sup> TCR $\beta$ <sup>+</sup> PBMCs on day>120 following LCMV infection, prior to adoptive transfer. Data representative of n=12/control, 14/TET2 cKO, 3 independent experiments (A-B) or n=8/control, 6/TET2 cKO, 2 independent experiments (C). \*p<0.05, unpaired t-test.



Supplementary Table 1

| Id                                        | Start     | Width | Gene Symbol   | Mean Meth Diff | # of CpGs | # of DMCs | DMR.pvalue | DMR.qvalue  |
|-------------------------------------------|-----------|-------|---------------|----------------|-----------|-----------|------------|-------------|
| NM_001113487_intron_1_0_chr11_117152351_f | 117152350 | 60393 | Sept9         | 21.43590202    | 6         | 3         | 3.1001E-18 | 4.81787E-18 |
| NM_001113486_intron_0_0_chr11_117061088_f | 117061087 | 19102 | Sept9         | 21.22728798    | 11        | 5         | 1.2198E-19 | 2.04141E-19 |
| NM_001113486_intron_1_0_chr11_117080246_f | 117080245 | 71467 | Sept9         | 25.10459861    | 5         | 3         | 2.3816E-33 | 3.21486E-32 |
| NM_001113486_intron_2_0_chr11_117152351_f | 117152350 | 60393 | Sept9         | 21.43590202    | 6         | 3         | 3.1001E-18 | 4.81787E-18 |
| NM_001081005_up_5000_chr2_166883434_f     | 166883433 | 5001  | 1500012F01RIK | 35.92695283    | 10        | 10        | 1.162E-27  | 3.94838E-27 |
| NM_198000_intron_3_0_chr2_30653501_r      | 30653500  | 2744  | 1700001O22RIK | 39.31940416    | 6         | 5         | 3.2677E-34 | 6.88387E-33 |
| NR_028486_intron_3_0_chr2_30653501_r      | 30653500  | 2744  | 1700001O22RIK | 39.31940416    | 6         | 5         | 3.2677E-34 | 6.88387E-33 |
| NR_028487_intron_3_0_chr2_30653501_r      | 30653500  | 2744  | 1700001O22RIK | 39.31940416    | 6         | 5         | 3.2677E-34 | 6.88387E-33 |
| NM_001033176_cds_1_0_chr7_52541812_f      | 52541811  | 188   | 1700039E15RIK | 25.10602453    | 12        | 6         | 1.1842E-20 | 2.13013E-20 |
| NM_001033176_cds_2_0_chr7_52542252_f      | 52542251  | 203   | 1700039E15RIK | 25.10602453    | 12        | 6         | 1.1842E-20 | 2.13013E-20 |
| NM_001033176_intron_1_0_chr7_52541999_f   | 52541998  | 254   | 1700039E15RIK | 25.10602453    | 12        | 6         | 1.1842E-20 | 2.13013E-20 |
| NR_045501_intron_3_0_chr13_114256728_r    | 114256727 | 17999 | 4921509O07RIK | 38.25741868    | 7         | 6         | 5.6068E-24 | 1.34564E-23 |
| NM_028765_intron_13_0_chr2_127870192_f    | 127870191 | 31392 | ACOXL         | 30.54042023    | 6         | 6         | 1.2088E-34 | 2.79499E-33 |
| NM_009616_cds_15_0_chr11_45949750_f       | 45949749  | 215   | ADAM19        | 20.72692789    | 12        | 3         | 2.8668E-17 | 4.22009E-17 |
| NM_009616_intron_14_0_chr11_45948039_f    | 45948038  | 1712  | ADAM19        | 20.72692789    | 12        | 3         | 2.8668E-17 | 4.22009E-17 |
| NM_009616_intron_15_0_chr11_45949964_f    | 45949963  | 903   | ADAM19        | 20.72692789    | 12        | 3         | 2.8668E-17 | 4.22009E-17 |
| NM_130863_intron_19_0_chr19_4294927_r     | 4294926   | 10196 | ADRBK1        | 29.22068422    | 6         | 4         | 4.3479E-32 | 4.52942E-31 |
| NM_178803 utr5_0_0_chr6_140571184_f       | 140571183 | 397   | AEBP2         | 44.6884413     | 6         | 5         | 1.2088E-34 | 2.79499E-33 |
| NM_009637_up_5000_chr6_140567819_f        | 140567818 | 5001  | AEBP2         | 44.6884413     | 6         | 5         | 1.2088E-34 | 2.79499E-33 |
| NM_001005605_up_5000_chr6_140567210_f     | 140567209 | 5001  | AEBP2         | 44.6884413     | 6         | 5         | 1.2088E-34 | 2.79499E-33 |
| NM_001276288_intron_2_0_chr10_81026904_f  | 81026903  | 515   | AES           | 28.96905985    | 5         | 4         | 1.0376E-20 | 1.89164E-20 |
| NM_010347_intron_2_0_chr10_81026904_f     | 81026903  | 515   | AES           | 28.96905985    | 5         | 4         | 1.0376E-20 | 1.89164E-20 |
| NR_074087_intron_2_0_chr10_81026904_f     | 81026903  | 515   | AES           | 28.96905985    | 5         | 4         | 1.0376E-20 | 1.89164E-20 |
| NM_001002895_cds_1_0_chr17_27701094_r     | 27701093  | 107   | AI413582      | 37.56802353    | 6         | 6         | 2.6993E-33 | 3.36699E-32 |
| NM_001002895_intron_1_0_chr17_27701200_r  | 27701199  | 131   | AI413582      | 37.56802353    | 6         | 6         | 2.6993E-33 | 3.36699E-32 |
| NM_009672_intron_0_0_chr9_62189362_f      | 62189361  | 30166 | ANP32A        | 39.92604683    | 9         | 8         | 5.515E-33  | 6.61804E-32 |
| NM_009672 utr3_6_0_chr9_62225423_f        | 62225422  | 1188  | ANP32A        | 36.6859258     | 6         | 6         | 3.1342E-22 | 6.34868E-22 |

|                                           |           |        |          |             |    |    |            |             |
|-------------------------------------------|-----------|--------|----------|-------------|----|----|------------|-------------|
| NM_172725_cds_13_0_chr5_142951657_f       | 142951656 | 99     | AP5Z1    | 22.12968178 | 6  | 3  | 4.5186E-17 | 6.58012E-17 |
| NM_172725_cds_16_0_chr5_142953170_f       | 142953169 | 272    | AP5Z1    | 28.09873483 | 11 | 7  | 8.3016E-30 | 4.54911E-29 |
| NM_172725_intron_13_0_chr5_142951755_f    | 142951754 | 894    | AP5Z1    | 22.12968178 | 6  | 3  | 4.5186E-17 | 6.58012E-17 |
| NM_013476_cds_0_0_chrX_95345121_f         | 95345120  | 1554   | AR       | -26.0687053 | 6  | 4  | 9.7673E-15 | 1.23788E-14 |
| NM_001039939_cds_10_0_chr2_153223112_f    | 153223111 | 626    | ASXL1    | 51.51659352 | 7  | 7  | 1.6362E-35 | 8.19509E-34 |
| NM_178662_intron_10_0_chr10_80681959_r    | 80681958  | 5211   | ATCAY    | 22.70392042 | 8  | 4  | 2.5705E-27 | 8.2604E-27  |
| NM_019835_intron_7_0_chr2_167138722_r     | 167138721 | 35697  | B4GALT5  | 23.32296528 | 5  | 3  | 2.2361E-18 | 3.50272E-18 |
| NM_001163270_cds_14_0_chr17_25383749_r    | 25383748  | 53     | BAIAP3   | 39.42457613 | 5  | 4  | 2.5095E-33 | 3.21486E-32 |
| NM_001163270_intron_13_0_chr17_25383634_r | 25383633  | 116    | BAIAP3   | 39.42457613 | 5  | 4  | 2.5095E-33 | 3.21486E-32 |
| NM_021399_intron_0_0_chr12_109155625_r    | 109155624 | 72051  | BCL11B   | 26.79149769 | 7  | 4  | 2.1497E-28 | 9.28071E-28 |
| NM_021399_intron_0_0_chr12_109155625_r    | 109155624 | 72051  | BCL11B   | 32.36413026 | 8  | 7  | 4.529E-36  | 3.30266E-34 |
| NM_001079883_intron_0_0_chr12_109155625_r | 109155624 | 48258  | BCL11B   | 26.79149769 | 7  | 4  | 2.1497E-28 | 9.28071E-28 |
| NM_001079883_intron_1_0_chr12_109204098_r | 109204097 | 23578  | BCL11B   | 32.36413026 | 8  | 7  | 4.529E-36  | 3.30266E-34 |
| NM_009743_cds_1_0_chr2_152655163_r        | 152655162 | 565    | BCL2L1   | 23.52001032 | 11 | 5  | 1.6805E-22 | 3.47078E-22 |
| NM_080708_intron_14_0_chr5_97503763_f     | 97503762  | 12000  | BMP2K    | 45.37825627 | 6  | 6  | 6.3058E-33 | 7.47242E-32 |
| NM_030178_intron_0_0_chr6_113257332_f     | 113257331 | 2466   | BRPF1    | 29.97322242 | 17 | 11 | 8.2838E-31 | 5.20071E-30 |
| NM_175488_intron_7_0_chr10_93028691_f     | 93028690  | 1719   | CCDC38   | 43.45451929 | 5  | 5  | 2.5095E-33 | 3.21486E-32 |
| NM_001080808_intron_7_0_chr5_116174766_r  | 116174765 | 6366   | CCDC64   | 24.80304427 | 7  | 4  | 7.0241E-28 | 2.41264E-27 |
| NM_026681_intron_26_0_chr12_102222180_r   | 102222179 | 38325  | CCDC88C  | 35.90067456 | 7  | 6  | 2.8401E-33 | 3.49662E-32 |
| NM_007719_cds_0_0_chr11_99006272_r        | 99006271  | 1078   | CCR7     | 30.0182427  | 11 | 9  | 1.8507E-23 | 4.19738E-23 |
| NM_007719_utr3_0_0_chr11_99005513_r       | 99005512  | 760    | CCR7     | 30.0182427  | 11 | 9  | 1.8507E-23 | 4.19738E-23 |
| NM_009852_intron_11_0_chr19_10874903_r    | 10874902  | 29396  | CD6      | 30.11949766 | 6  | 6  | 1.0059E-30 | 6.19216E-30 |
| NM_001037801_intron_10_0_chr19_10874903_r | 10874902  | 29396  | CD6      | 30.11949766 | 6  | 6  | 1.0059E-30 | 6.19216E-30 |
| NM_001123386_cds_1_0_chr13_35907778_f     | 35907777  | 668    | CDYL     | 25.72753514 | 7  | 4  | 1.7583E-30 | 1.06849E-29 |
| NM_009881_cds_4_0_chr13_35907778_f        | 35907777  | 668    | CDYL     | 25.72753514 | 7  | 4  | 1.7583E-30 | 1.06849E-29 |
| NM_001033419_cds_5_0_chr7_20446458_r      | 20446457  | 44     | CEACAM16 | 21.43043412 | 5  | 3  | 3.6463E-18 | 5.62066E-18 |
| NM_001033419_intron_4_0_chr7_20444288_r   | 20444287  | 2171   | CEACAM16 | 21.43043412 | 5  | 3  | 3.6463E-18 | 5.62066E-18 |
| NM_001033419_utr5_5_0_chr7_20446501_r     | 20446500  | 149    | CEACAM16 | 21.43043412 | 5  | 3  | 3.6463E-18 | 5.62066E-18 |
| NM_001033419_up_5000_chr7_20446649_r      | 20446648  | 5001   | CEACAM16 | 21.43043412 | 5  | 3  | 3.6463E-18 | 5.62066E-18 |
| NM_001277149_intron_3_0_chr4_8728613_f    | 8728612   | 3686   | CHD7     | 39.00610582 | 5  | 5  | 2.5095E-33 | 3.21486E-32 |
| NM_009601_up_5000_chr11_69609440_r        | 69609439  | 5001   | CHRNB1   | 22.35937227 | 9  | 4  | 6.1165E-19 | 9.87808E-19 |
| NM_029556_intron_0_0_chr14_122581004_f    | 122581003 | 129463 | CLYBL    | 29.08136115 | 5  | 3  | 1.0802E-20 | 1.95807E-20 |

|                                            |           |        |               |             |    |    |            |             |
|--------------------------------------------|-----------|--------|---------------|-------------|----|----|------------|-------------|
| NM_001163262_intron_0_0_chr8_119781302_f   | 119781301 | 119674 | CMIP          | 29.2644923  | 9  | 4  | 1.8825E-23 | 4.24904E-23 |
| NM_001163262_intron_0_0_chr8_119781302_f   | 119781301 | 119674 | CMIP          | 32.09297614 | 7  | 5  | 2.5808E-33 | 3.26214E-32 |
| NM_001164804_intron_10_0_chr4_46575968_r   | 46575967  | 38722  | CORO2A        | 26.82484934 | 11 | 4  | 2.0909E-32 | 2.30483E-31 |
| NM_001025432_intron_14_0_chr16_4109219_r   | 4109218   | 5556   | CREBBP        | 26.32870522 | 5  | 3  | 5.8765E-28 | 2.03318E-27 |
| NM_201354_intron_2_0_chr18_75631675_r      | 75631674  | 47719  | CTIF          | 35.15107892 | 5  | 4  | 1.3964E-27 | 4.66138E-27 |
| NM_201354_intron_5_0_chr18_75724735_r      | 75724734  | 40548  | CTIF          | 30.10544625 | 6  | 4  | 4.9299E-14 | 6.08539E-14 |
| NM_198013_intron_0_0_chr11_87912846_f      | 87912845  | 70222  | CUEDC1        | 54.63232614 | 10 | 10 | 3.4136E-36 | 3.30266E-34 |
| NM_133687_intron_0_0_chr18_35989641_f      | 35989640  | 28407  | CXXC5         | 20.67218774 | 9  | 4  | 1.0205E-13 | 1.24674E-13 |
| NM_028061 utr3_0_0_chr3_107998689_r        | 107998688 | 3442   | CYB561D1      | 23.46314398 | 8  | 4  | 1.0166E-21 | 1.98303E-21 |
| NM_001081320 utr3_0_0_chr3_107998689_r     | 107998688 | 3442   | CYB561D1      | 23.46314398 | 8  | 4  | 1.0166E-21 | 1.98303E-21 |
| NM_001252438_cds_2_0_chr16_78547821_r      | 78547820  | 517    | D16ERTD472E   | 33.08409355 | 8  | 7  | 4.529E-36  | 3.30266E-34 |
| NM_001252440_cds_2_0_chr16_78547821_r      | 78547820  | 517    | D16ERTD472E   | 33.08409355 | 8  | 7  | 4.529E-36  | 3.30266E-34 |
| NM_001252439_cds_2_0_chr16_78547821_r      | 78547820  | 517    | D16ERTD472E   | 33.08409355 | 8  | 7  | 4.529E-36  | 3.30266E-34 |
| NM_025967_cds_2_0_chr16_78547821_r         | 78547820  | 517    | D16ERTD472E   | 33.08409355 | 8  | 7  | 4.529E-36  | 3.30266E-34 |
| NM_001033347 utr3_0_0_chr2_103983232_r     | 103983231 | 5707   | D430041D05RIK | 42.85727872 | 10 | 10 | 1.3699E-36 | 3.30266E-34 |
| NR_045848 utr5_2_0_chr7_25941113_f         | 25941112  | 538    | D930028M14RIK | 22.11685157 | 9  | 3  | 8.4952E-24 | 1.98851E-23 |
| NR_045847 utr5_2_0_chr7_25941113_f         | 25941112  | 538    | D930028M14RIK | 22.11685157 | 9  | 3  | 8.4952E-24 | 1.98851E-23 |
| NM_198114_intron_14_0_chr19_10339586_r     | 10339585  | 4092   | DAGLA         | 40.73150936 | 5  | 5  | 2.5095E-33 | 3.21486E-32 |
| NM_011932_intron_5_0_chr3_137612742_r      | 137612741 | 11665  | DAPP1         | 36.96739841 | 5  | 4  | 3.406E-26  | 9.93495E-26 |
| NM_197982_cds_5_0_chr8_86245633_f          | 86245632  | 120    | DDX39         | 23.69692555 | 16 | 7  | 3.367E-22  | 6.79138E-22 |
| NM_197982_intron_4_0_chr8_86245040_f       | 86245039  | 594    | DDX39         | 23.69692555 | 16 | 7  | 3.367E-22  | 6.79138E-22 |
| NM_197982_intron_5_0_chr8_86245752_f       | 86245751  | 378    | DDX39         | 23.69692555 | 16 | 7  | 3.367E-22  | 6.79138E-22 |
| NM_016811_intron_22_0_chr10_128174201_r    | 128174200 | 6652   | DGKA          | 24.48012105 | 6  | 3  | 8.1606E-17 | 1.16686E-16 |
| NM_001081206_intron_23_0_chr6_37000253_r   | 37000252  | 7110   | DGKI          | 27.29218343 | 6  | 3  | 3.5896E-27 | 1.13811E-26 |
| NM_033374_intron_47_0_chr11_34545089_r     | 34545088  | 755    | DOCK2         | 33.68460127 | 6  | 4  | 9.0309E-24 | 2.08811E-23 |
| NM_134074_intron_17_0_chr14_121994831_r    | 121994830 | 2034   | DOCK9         | 22.24663241 | 10 | 6  | 5.6923E-15 | 7.30218E-15 |
| NM_001128307_intron_20_0_chr14_121994831_r | 121994830 | 2034   | DOCK9         | 22.24663241 | 10 | 6  | 5.6923E-15 | 7.30218E-15 |
| NM_001128308_intron_18_0_chr14_121994831_r | 121994830 | 2034   | DOCK9         | 22.24663241 | 10 | 6  | 5.6923E-15 | 7.30218E-15 |
| NM_001081039_intron_18_0_chr14_121994831_r | 121994830 | 2034   | DOCK9         | 22.24663241 | 10 | 6  | 5.6923E-15 | 7.30218E-15 |
| NM_026854_intron_1_0_chr18_49860042_r      | 49860041  | 23235  | DTWD2         | 46.96407306 | 6  | 6  | 1.2088E-34 | 2.79499E-33 |
| NM_001170960_intron_1_0_chr18_49860042_r   | 49860041  | 27982  | DTWD2         | 46.96407306 | 6  | 6  | 1.2088E-34 | 2.79499E-33 |
| NM_022019_intron_1_0_chr1_185861532_f      | 185861531 | 31200  | DUSP10        | 40.15178097 | 6  | 4  | 7.604E-24  | 1.78874E-23 |

|                                           |           |       |         |             |    |    |            |             |
|-------------------------------------------|-----------|-------|---------|-------------|----|----|------------|-------------|
| NM_001085390_cds_2_0_chr19_53611947_f     | 53611946  | 221   | DUSP5   | 38.3350557  | 5  | 5  | 6.496E-30  | 3.62245E-29 |
| NM_007888_up_5000_chr11_69809128_f        | 69809127  | 5001  | DVL2    | 45.57868731 | 5  | 5  | 2.4299E-33 | 3.21486E-32 |
| NM_199307_intron_0_0_chr4_137418297_f     | 137418296 | 42689 | ECE1    | 20.54134411 | 11 | 5  | 1.025E-16  | 1.45246E-16 |
| NM_147151_up_5000_chr17_35030444_f        | 35030443  | 5001  | EHMT2   | 25.35466925 | 30 | 14 | 1.0573E-16 | 1.49594E-16 |
| NM_145830_up_5000_chr17_35030919_f        | 35030918  | 5001  | EHMT2   | 25.35466925 | 30 | 14 | 1.0573E-16 | 1.49594E-16 |
| NM_008813_cds_5_0_chr10_24371051_r        | 24371050  | 153   | ENPP1   | 41.63910137 | 6  | 6  | 1.2088E-34 | 2.79499E-33 |
| NM_001146045_intron_0_0_chr13_97837278_f  | 97837277  | 24496 | FAM169A | 28.84932688 | 11 | 7  | 6.3001E-27 | 1.9204E-26  |
| NM_001100458_intron_0_0_chr13_97841667_f  | 97841666  | 20107 | FAM169A | 28.84932688 | 11 | 7  | 6.3001E-27 | 1.9204E-26  |
| NM_001080708_intron_17_0_chr2_167820478_r | 167820477 | 2267  | FAM65C  | 21.23708026 | 10 | 3  | 6.3677E-29 | 3.17715E-28 |
| NM_016925_intron_16_0_chr8_125810452_r    | 125810451 | 1510  | FANCA   | 44.15146814 | 8  | 7  | 6.8517E-33 | 8.01908E-32 |
| NM_001278075_cds_3_0_chr1_78451329_r      | 78451328  | 119   | FARSB   | 30.05294333 | 6  | 4  | 1.4276E-27 | 4.74864E-27 |
| NM_011811_cds_2_0_chr1_78451329_r         | 78451328  | 119   | FARSB   | 30.05294333 | 6  | 4  | 1.4276E-27 | 4.74864E-27 |
| NM_001278075_intron_2_0_chr1_78440366_r   | 78440365  | 10964 | FARSB   | 30.05294333 | 6  | 4  | 1.4276E-27 | 4.74864E-27 |
| NM_001278075_intron_3_0_chr1_78451447_r   | 78451446  | 3694  | FARSB   | 30.05294333 | 6  | 4  | 1.4276E-27 | 4.74864E-27 |
| NM_011811_intron_1_0_chr1_78440366_r      | 78440365  | 10964 | FARSB   | 30.05294333 | 6  | 4  | 1.4276E-27 | 4.74864E-27 |
| NM_011811_intron_2_0_chr1_78451447_r      | 78451446  | 3694  | FARSB   | 30.05294333 | 6  | 4  | 1.4276E-27 | 4.74864E-27 |
| NR_102757_intron_1_0_chr1_78440366_r      | 78440365  | 10964 | FARSB   | 30.05294333 | 6  | 4  | 1.4276E-27 | 4.74864E-27 |
| NR_102757_intron_2_0_chr1_78451447_r      | 78451446  | 3694  | FARSB   | 30.05294333 | 6  | 4  | 1.4276E-27 | 4.74864E-27 |
| NR_102758_intron_1_0_chr1_78440366_r      | 78440365  | 10964 | FARSB   | 30.05294333 | 6  | 4  | 1.4276E-27 | 4.74864E-27 |
| NR_102758_intron_2_0_chr1_78451447_r      | 78451446  | 3694  | FARSB   | 30.05294333 | 6  | 4  | 1.4276E-27 | 4.74864E-27 |
| NR_102757_utr3_2_0_chr1_78451329_r        | 78451328  | 119   | FARSB   | 30.05294333 | 6  | 4  | 1.4276E-27 | 4.74864E-27 |
| NR_102758_utr3_2_0_chr1_78451329_r        | 78451328  | 119   | FARSB   | 30.05294333 | 6  | 4  | 1.4276E-27 | 4.74864E-27 |
| NM_175234_intron_0_0_chr4_21858977_f      | 21858976  | 4804  | FAXC    | 46.37556752 | 6  | 6  | 1.2088E-34 | 2.79499E-33 |
| NM_010198_cds_0_0_chr11_69611704_r        | 69611703  | 72    | FGF11   | 22.35937227 | 9  | 4  | 6.1165E-19 | 9.87808E-19 |
| NM_001177648_intron_15_0_chr2_30960878_r  | 30960877  | 36422 | FNBP1   | 24.85697924 | 6  | 3  | 2.3102E-29 | 1.20996E-28 |
| NM_001177649_intron_13_0_chr2_30960878_r  | 30960877  | 36422 | FNBP1   | 24.85697924 | 6  | 3  | 2.3102E-29 | 1.20996E-28 |
| NM_019406_intron_7_0_chr2_30960878_r      | 30960877  | 36422 | FNBP1   | 24.85697924 | 6  | 3  | 2.3102E-29 | 1.20996E-28 |
| NM_001038700_intron_13_0_chr2_30960878_r  | 30960877  | 36422 | FNBP1   | 24.85697924 | 6  | 3  | 2.3102E-29 | 1.20996E-28 |
| NM_145927_intron_1_0_chr12_77963538_f     | 77963537  | 10826 | FNTB    | 51.74250655 | 6  | 6  | 1.2088E-34 | 2.79499E-33 |
| NM_010235_cds_1_0_chr19_5450160_f         | 5450159   | 193   | FOSL1   | 24.290317   | 6  | 3  | 6.4181E-10 | 6.93766E-10 |
| NM_199068_intron_1_0_chr5_142911281_f     | 142911280 | 13361 | FOXK1   | 38.64761536 | 9  | 7  | 2.1617E-33 | 3.21486E-32 |
| NM_183186_intron_2_0_chr12_100529512_r    | 100529511 | 50121 | FOXN3   | 40.61722784 | 7  | 6  | 1.0965E-33 | 2.16556E-32 |

|                                           |           |       |         |             |    |   |            |             |
|-------------------------------------------|-----------|-------|---------|-------------|----|---|------------|-------------|
| NM_053202_intron_13_0_chr6_98966660_r     | 98966659  | 59189 | FOXP1   | 33.88562611 | 5  | 4 | 8.4478E-26 | 2.3624E-25  |
| NM_001197321_intron_13_0_chr6_98966660_r  | 98966659  | 59189 | FOXP1   | 33.88562611 | 5  | 4 | 8.4478E-26 | 2.3624E-25  |
| NM_001197322_up_5000_chr6_98978293_r      | 98978292  | 5001  | FOXP1   | 33.88562611 | 5  | 4 | 8.4478E-26 | 2.3624E-25  |
| NM_147221_intron_3_0_chr4_107241107_f     | 107241106 | 46471 | GLIS1   | 27.37947402 | 10 | 6 | 1.2909E-25 | 3.54724E-25 |
| NR_033332_intron_0_0_chr11_53599852_r     | 53599851  | 27227 | GM12216 | 23.16945004 | 9  | 4 | 1.9739E-19 | 3.27714E-19 |
| NM_181421_cds_72_0_chr5_121813752_f       | 121813751 | 165   | GM15800 | 31.71473551 | 6  | 3 | 7.3128E-24 | 1.72451E-23 |
| NM_001145637_intron_5_0_chr4_116888167_r  | 116888166 | 12733 | GM1661  | 34.44416463 | 6  | 5 | 2.385E-32  | 2.59886E-31 |
| NM_001033774_intron_0_0_chr4_116888167_r  | 116888166 | 12733 | GM1661  | 34.44416463 | 6  | 5 | 2.385E-32  | 2.59886E-31 |
| NR_045322_intron_0_0_chr19_47587498_f     | 47587497  | 256   | GM19557 | 21.20165879 | 8  | 4 | 3.0796E-08 | 3.22241E-08 |
| NR_045322_utr5_0_0_chr19_47587472_f       | 47587471  | 27    | GM19557 | 21.20165879 | 8  | 4 | 3.0796E-08 | 3.22241E-08 |
| NM_001004164_intron_1_0_chr10_87863483_f  | 87863482  | 11179 | GNPTAB  | 35.12879632 | 8  | 7 | 2.0652E-35 | 9.78895E-34 |
| NM_172768_up_5000_chr9_40263350_r         | 40263349  | 5001  | GRAMD1B | 27.81143528 | 6  | 4 | 1.2167E-27 | 4.11956E-27 |
| NM_010365_intron_10_0_chr5_134721053_r    | 134721052 | 1328  | GTF2I   | 28.65428021 | 6  | 4 | 1.2088E-34 | 2.79499E-33 |
| NM_001080747_intron_10_0_chr5_134721053_r | 134721052 | 1328  | GTF2I   | 28.65428021 | 6  | 4 | 1.2088E-34 | 2.79499E-33 |
| NM_001080746_intron_10_0_chr5_134721053_r | 134721052 | 1328  | GTF2I   | 28.65428021 | 6  | 4 | 1.2088E-34 | 2.79499E-33 |
| NM_001080749_intron_10_0_chr5_134721053_r | 134721052 | 1328  | GTF2I   | 28.65428021 | 6  | 4 | 1.2088E-34 | 2.79499E-33 |
| NM_001080748_intron_10_0_chr5_134721053_r | 134721052 | 1328  | GTF2I   | 28.65428021 | 6  | 4 | 1.2088E-34 | 2.79499E-33 |
| NM_010368_cds_4_0_chr5_130473650_r        | 130473649 | 148   | GUSB    | 22.7035974  | 11 | 4 | 1.0858E-14 | 1.37431E-14 |
| NM_010368_cds_5_0_chr5_130473887_r        | 130473886 | 180   | GUSB    | 22.7035974  | 11 | 4 | 1.0858E-14 | 1.37431E-14 |
| NM_010368_intron_3_0_chr5_130471402_r     | 130471401 | 2249  | GUSB    | 22.7035974  | 11 | 4 | 1.0858E-14 | 1.37431E-14 |
| NM_010368_intron_4_0_chr5_130473797_r     | 130473796 | 91    | GUSB    | 22.7035974  | 11 | 4 | 1.0858E-14 | 1.37431E-14 |
| NM_001204278_intron_22_0_chr15_97642060_r | 97642059  | 32478 | HDAC7   | 28.43557368 | 7  | 4 | 1.2671E-22 | 2.65765E-22 |
| NM_001204279_intron_22_0_chr15_97642060_r | 97642059  | 32478 | HDAC7   | 28.43557368 | 7  | 4 | 1.2671E-22 | 2.65765E-22 |
| NM_001204280_intron_20_0_chr15_97642060_r | 97642059  | 32478 | HDAC7   | 28.43557368 | 7  | 4 | 1.2671E-22 | 2.65765E-22 |
| NM_001204277_intron_23_0_chr15_97642060_r | 97642059  | 19731 | HDAC7   | 28.43557368 | 7  | 4 | 1.2671E-22 | 2.65765E-22 |
| NM_001204276_intron_23_0_chr15_97642060_r | 97642059  | 15107 | HDAC7   | 28.43557368 | 7  | 4 | 1.2671E-22 | 2.65765E-22 |
| NM_001204275_intron_23_0_chr15_97642060_r | 97642059  | 32478 | HDAC7   | 28.43557368 | 7  | 4 | 1.2671E-22 | 2.65765E-22 |
| NM_019572_intron_22_0_chr15_97642060_r    | 97642059  | 19731 | HDAC7   | 28.43557368 | 7  | 4 | 1.2671E-22 | 2.65765E-22 |
| NM_001204281_up_5000_chr15_97645295_r     | 97645294  | 5001  | HDAC7   | 28.43557368 | 7  | 4 | 1.2671E-22 | 2.65765E-22 |
| NM_146001_intron_29_0_chr5_135936341_r    | 135936340 | 84467 | HIP1    | 20.17295422 | 8  | 3 | 2.0192E-27 | 6.51097E-27 |
| NM_010437_intron_0_0_chr10_13686504_f     | 13686503  | 99886 | HIVEP2  | 36.85672551 | 6  | 5 | 1.8343E-31 | 1.60058E-30 |
| NM_013820_intron_15_0_chr6_82699332_r     | 82699331  | 10767 | HK2     | 25.04122233 | 8  | 4 | 3.2611E-28 | 1.15786E-27 |



|                                           |           |       |         |             |    |   |            |             |
|-------------------------------------------|-----------|-------|---------|-------------|----|---|------------|-------------|
| NM_013820_intron_16_0_chr6_82710261_r     | 82710260  | 13652 | HK2     | 45.75228057 | 6  | 6 | 1.1116E-34 | 2.79499E-33 |
| NM_027521_cds_1_0_chr10_79483435_f        | 79483434  | 145   | HMHA1   | 23.54619358 | 5  | 3 | 1.3715E-17 | 2.04752E-17 |
| NM_001142701_cds_2_0_chr10_79483435_f     | 79483434  | 145   | HMHA1   | 23.54619358 | 5  | 3 | 1.3715E-17 | 2.04752E-17 |
| NM_027521_intron_1_0_chr10_79483579_f     | 79483578  | 118   | HMHA1   | 23.54619358 | 5  | 3 | 1.3715E-17 | 2.04752E-17 |
| NM_001142701_intron_2_0_chr10_79483579_f  | 79483578  | 118   | HMHA1   | 23.54619358 | 5  | 3 | 1.3715E-17 | 2.04752E-17 |
| NM_134109_intron_2_0_chr16_36709715_f     | 36709714  | 5873  | ILDR1   | 21.30043139 | 10 | 4 | 3.5017E-31 | 2.27369E-30 |
| NM_172161_cds_4_0_chr6_113622733_f        | 113622732 | 202   | IRAK2   | 33.35923652 | 6  | 3 | 2.2631E-25 | 6.09485E-25 |
| NM_172161_cds_5_0_chr6_113623017_f        | 113623016 | 66    | IRAK2   | 33.35923652 | 6  | 3 | 2.2631E-25 | 6.09485E-25 |
| NM_001113553_cds_3_0_chr6_113622733_f     | 113622732 | 202   | IRAK2   | 33.35923652 | 6  | 3 | 2.2631E-25 | 6.09485E-25 |
| NM_001113553_cds_4_0_chr6_113623017_f     | 113623016 | 66    | IRAK2   | 33.35923652 | 6  | 3 | 2.2631E-25 | 6.09485E-25 |
| NM_172161_intron_4_0_chr6_113622934_f     | 113622933 | 84    | IRAK2   | 33.35923652 | 6  | 3 | 2.2631E-25 | 6.09485E-25 |
| NM_172161_intron_5_0_chr6_113623082_f     | 113623081 | 2544  | IRAK2   | 33.35923652 | 6  | 3 | 2.2631E-25 | 6.09485E-25 |
| NM_001113553_intron_3_0_chr6_113622934_f  | 113622933 | 84    | IRAK2   | 33.35923652 | 6  | 3 | 2.2631E-25 | 6.09485E-25 |
| NM_001113553_intron_4_0_chr6_113623082_f  | 113623081 | 2544  | IRAK2   | 33.35923652 | 6  | 3 | 2.2631E-25 | 6.09485E-25 |
| NM_013674_cds_6_0_chr13_30849277_f        | 30849276  | 355   | IRF4    | 29.00939085 | 12 | 5 | 1.409E-34  | 3.10628E-33 |
| NM_019923_intron_5_0_chr6_146115194_r     | 146115193 | 4553  | ITPR2   | 27.23532274 | 6  | 4 | 2.3011E-17 | 3.40317E-17 |
| NM_010586_intron_5_0_chr6_146115194_r     | 146115193 | 4553  | ITPR2   | 27.23532274 | 6  | 4 | 2.3011E-17 | 3.40317E-17 |
| NM_021878_up_5000_chr13_44821143_f        | 44821142  | 5001  | JARID2  | 25.37965112 | 6  | 4 | 2.0114E-16 | 2.80414E-16 |
| NM_001205043_up_5000_chr13_44821640_f     | 44821639  | 5001  | JARID2  | 25.37965112 | 6  | 4 | 2.0114E-16 | 2.80414E-16 |
| NM_001205044_up_5000_chr13_44821143_f     | 44821142  | 5001  | JARID2  | 25.37965112 | 6  | 4 | 2.0114E-16 | 2.80414E-16 |
| NM_001003953_intron_15_0_chr5_123397890_r | 123397889 | 1190  | KDM2B   | 27.46986742 | 10 | 5 | 3.7346E-21 | 7.06658E-21 |
| NM_001005866_intron_15_0_chr5_123397890_r | 123397889 | 1190  | KDM2B   | 27.46986742 | 10 | 5 | 3.7346E-21 | 7.06658E-21 |
| NM_013571_intron_15_0_chr11_78860947_r    | 78860946  | 26902 | KSR1    | 31.38465388 | 10 | 6 | 5.1264E-35 | 2.20901E-33 |
| NM_013571_intron_16_0_chr11_78887989_r    | 78887988  | 71569 | KSR1    | 24.57001854 | 6  | 3 | 3.5482E-25 | 9.44845E-25 |
| NM_172950_intron_7_0_chr12_16560835_r     | 16560834  | 4381  | LPIN1   | 43.93818603 | 7  | 6 | 7.2647E-31 | 4.59127E-30 |
| NM_001130412_intron_7_0_chr12_16560835_r  | 16560834  | 4381  | LPIN1   | 43.93818603 | 7  | 6 | 7.2647E-31 | 4.59127E-30 |
| NM_015763_intron_7_0_chr12_16560835_r     | 16560834  | 4381  | LPIN1   | 43.93818603 | 7  | 6 | 7.2647E-31 | 4.59127E-30 |
| NM_001252132_intron_17_0_chr14_75257929_r | 75257928  | 89263 | LRCH1   | 47.71766807 | 5  | 5 | 2.4987E-33 | 3.21486E-32 |
| NM_001033439_intron_18_0_chr14_75257929_r | 75257928  | 89263 | LRCH1   | 47.71766807 | 5  | 5 | 2.4987E-33 | 3.21486E-32 |
| NM_008377_intron_17_0_chr6_94613993_r     | 94613992  | 35464 | LRIG1   | 21.340668   | 8  | 3 | 2.2021E-09 | 2.35085E-09 |
| NM_010749_up_5000_chr6_122254028_f        | 122254027 | 5001  | M6PR    | 41.65318613 | 6  | 6 | 9.9514E-35 | 2.79499E-33 |
| NM_172295_up_5000_chr3_101640147_r        | 101640146 | 5001  | MAB21L3 | 25.63075866 | 5  | 4 | 6.9517E-28 | 2.39643E-27 |

|                                          |           |       |         |             |    |   |            |             |
|------------------------------------------|-----------|-------|---------|-------------|----|---|------------|-------------|
| NM_008634_cds_2_0_chr13_100199167_r      | 100199166 | 6491  | MAP1B   | 23.74859584 | 6  | 3 | 1.1916E-11 | 1.34325E-11 |
| NM_016896_cds_11_0_chr11_103100246_r     | 103100245 | 622   | MAP3K14 | 21.88071127 | 9  | 4 | 1.2822E-12 | 1.50619E-12 |
| NM_016896_cds_12_0_chr11_103100946_r     | 103100945 | 212   | MAP3K14 | 21.88071127 | 9  | 4 | 1.2822E-12 | 1.50619E-12 |
| NM_016896_intron_11_0_chr11_103100867_r  | 103100866 | 80    | MAP3K14 | 21.88071127 | 9  | 4 | 1.2822E-12 | 1.50619E-12 |
| NM_016896_intron_12_0_chr11_103101157_r  | 103101156 | 1195  | MAP3K14 | 21.88071127 | 9  | 4 | 1.2822E-12 | 1.50619E-12 |
| NM_177461_intron_14_0_chr15_78962530_f   | 78962529  | 901   | MICALL1 | 21.75903531 | 6  | 3 | 1.8472E-27 | 6.03832E-27 |
| NM_013603_up_5000_chr8_96671507_f        | 96671506  | 5001  | MT3     | 30.16768818 | 6  | 4 | 5.5637E-25 | 1.46918E-24 |
| NM_029581_cds_2_0_chr5_147770401_r       | 147770400 | 452   | MTIF3   | 30.19134807 | 9  | 5 | 3.6441E-24 | 8.85788E-24 |
| NM_001256101_cds_2_0_chr5_147770401_r    | 147770400 | 452   | MTIF3   | 30.19134807 | 9  | 5 | 3.6441E-24 | 8.85788E-24 |
| NM_001256100_cds_2_0_chr5_147770401_r    | 147770400 | 452   | MTIF3   | 30.19134807 | 9  | 5 | 3.6441E-24 | 8.85788E-24 |
| NM_001256102_cds_2_0_chr5_147770401_r    | 147770400 | 452   | MTIF3   | 30.19134807 | 9  | 5 | 3.6441E-24 | 8.85788E-24 |
| NM_001039546_intron_18_0_chr9_80121769_f | 80121768  | 2347  | MYO6    | 31.01984598 | 5  | 3 | 1.8421E-28 | 8.68799E-28 |
| NM_007789_intron_3_0_chr8_72624215_r     | 72624214  | 1586  | NCAN    | 20.24347907 | 7  | 3 | 1.5986E-11 | 1.78709E-11 |
| NM_021605_intron_7_0_chr1_140440921_r    | 140440920 | 17360 | NEK7    | 56.80730767 | 6  | 6 | 1.2088E-34 | 2.79499E-33 |
| NM_008718_intron_1_0_chr7_17044630_r     | 17044629  | 1526  | NPAS1   | 30.76324799 | 6  | 4 | 2.0011E-24 | 4.9921E-24  |
| NM_175360_intron_2_0_chr19_47584948_r    | 47584947  | 3354  | OBFC1   | 21.20165879 | 8  | 4 | 3.0796E-08 | 3.22241E-08 |
| NM_172416_utr3_5_0_chr10_42420345_f      | 42420344  | 1925  | OSTM1   | 38.37731849 | 6  | 6 | 3.0866E-33 | 3.75145E-32 |
| NM_001100395_cds_17_0_chr5_30682897_r    | 30682896  | 164   | OTOF    | 23.55267006 | 13 | 5 | 2.4364E-15 | 3.20341E-15 |
| NM_031875_cds_18_0_chr5_30682897_r       | 30682896  | 164   | OTOF    | 23.55267006 | 13 | 5 | 2.4364E-15 | 3.20341E-15 |
| NM_001100395_intron_17_0_chr5_30683060_r | 30683059  | 126   | OTOF    | 23.55267006 | 13 | 5 | 2.4364E-15 | 3.20341E-15 |
| NM_031875_intron_18_0_chr5_30683060_r    | 30683059  | 126   | OTOF    | 23.55267006 | 13 | 5 | 2.4364E-15 | 3.20341E-15 |
| NM_016768_intron_4_0_chr2_34060436_r     | 34060435  | 8337  | PBX3    | 31.87620421 | 6  | 4 | 5.4487E-23 | 1.19017E-22 |
| NM_172293_cds_5_0_chr15_97214513_f       | 97214512  | 1303  | PCED1B  | 41.7077887  | 5  | 5 | 2.5095E-33 | 3.21486E-32 |
| NM_172293_intron_4_0_chr15_97204581_f    | 97204580  | 9879  | PCED1B  | 22.3753293  | 9  | 4 | 2.0686E-12 | 2.40913E-12 |
| NM_172293_intron_4_0_chr15_97204581_f    | 97204580  | 9879  | PCED1B  | 36.82793315 | 7  | 6 | 8.9012E-24 | 2.07329E-23 |
| NM_145488_cds_1_0_chr17_46850857_f       | 46850856  | 165   | PEX6    | 47.74824125 | 6  | 6 | 1.2088E-34 | 2.79499E-33 |
| NM_001195083_cds_1_0_chr4_128420648_f    | 128420647 | 154   | PHC2    | 28.57030251 | 11 | 7 | 1.865E-28  | 8.75267E-28 |
| NM_001195130_cds_9_0_chr4_128420598_f    | 128420597 | 204   | PHC2    | 28.57030251 | 11 | 7 | 1.865E-28  | 8.75267E-28 |
| NM_018774_cds_9_0_chr4_128420598_f       | 128420597 | 204   | PHC2    | 28.57030251 | 11 | 7 | 1.865E-28  | 8.75267E-28 |
| NM_001195083_intron_1_0_chr4_128420801_f | 128420800 | 1446  | PHC2    | 28.57030251 | 11 | 7 | 1.865E-28  | 8.75267E-28 |
| NM_001195130_intron_9_0_chr4_128420801_f | 128420800 | 1446  | PHC2    | 28.57030251 | 11 | 7 | 1.865E-28  | 8.75267E-28 |
| NM_018774_intron_9_0_chr4_128420801_f    | 128420800 | 1446  | PHC2    | 28.57030251 | 11 | 7 | 1.865E-28  | 8.75267E-28 |

|                                            |           |        |            |             |    |    |            |             |
|--------------------------------------------|-----------|--------|------------|-------------|----|----|------------|-------------|
| NM_001195083 utr5_1_0_chr4_128420598_f     | 128420597 | 51     | PHC2       | 28.57030251 | 11 | 7  | 1.865E-28  | 8.75267E-28 |
| NM_030064 utr3_4_0_chr11_69812955_f        | 69812954  | 560    | PHF23      | 45.57868731 | 5  | 5  | 2.4299E-33 | 3.21486E-32 |
| NM_031376 intron_14_0_chr19_41406836_r     | 41406835  | 43501  | PIK3AP1    | 40.22865556 | 7  | 6  | 3.128E-31  | 2.04506E-30 |
| NM_001077495 intron_11_0_chr13_102472796_r | 102472795 | 6080   | PIK3R1     | 21.66959333 | 7  | 4  | 1.0681E-22 | 2.26526E-22 |
| NM_054051 intron_0_0_chr11_97580254_r      | 97580253  | 791    | PIP4K2B    | 29.98539497 | 5  | 3  | 8.1687E-33 | 9.44376E-32 |
| NM_032398 utr3_0_0_chr8_74021652_r         | 74021651  | 647    | PLVAP      | 23.48628234 | 5  | 3  | 5.557E-22  | 1.10442E-21 |
| NM_019938 utr3_20_0_chr8_112066305_f       | 112066304 | 239    | PMFBP1     | 24.74051015 | 6  | 4  | 3.0142E-29 | 1.56146E-28 |
| NM_008898 intron_0_0_chr5_136165123_f      | 136165122 | 26620  | POR        | 33.22133301 | 7  | 6  | 4.0835E-26 | 1.17308E-25 |
| NM_145610 cds_4_0_chr9_20694215_f          | 20694214  | 172    | PPAN       | 49.88906827 | 13 | 13 | 6.0595E-36 | 4.10316E-34 |
| NM_145610 intron_3_0_chr9_20694129_f       | 20694128  | 87     | PPAN       | 49.88906827 | 13 | 13 | 6.0595E-36 | 4.10316E-34 |
| NM_145610 intron_4_0_chr9_20694386_f       | 20694385  | 698    | PPAN       | 49.88906827 | 13 | 13 | 6.0595E-36 | 4.10316E-34 |
| NM_001110218 intron_0_0_chr10_122116487_f  | 122116486 | 102753 | PPM1H      | 25.89502883 | 11 | 5  | 3.0643E-12 | 3.53406E-12 |
| NM_176919 intron_0_0_chr10_122116487_f     | 122116486 | 102753 | PPM1H      | 25.89502883 | 11 | 5  | 3.0643E-12 | 3.53406E-12 |
| NR_027957 intron_1_0_chr2_173407615_r      | 173407614 | 4884   | PPP4R1L-PS | 20.83034754 | 5  | 3  | 1.137E-09  | 1.22483E-09 |
| NM_028999 intron_21_0_chr19_3526935_r      | 3526934   | 17174  | PPP6R3     | 41.27853759 | 6  | 6  | 1.2088E-34 | 2.79499E-33 |
| NM_001164159 intron_20_0_chr19_3526935_r   | 3526934   | 48707  | PPP6R3     | 41.27853759 | 6  | 6  | 1.2088E-34 | 2.79499E-33 |
| NM_029456 intron_20_0_chr19_3526935_r      | 3526934   | 17174  | PPP6R3     | 41.27853759 | 6  | 6  | 1.2088E-34 | 2.79499E-33 |
| NM_007548 cds_3_0_chr10_44166598_r         | 44166597  | 254    | PRDM1      | 23.89968816 | 10 | 5  | 1.4287E-20 | 2.54114E-20 |
| NM_007548 intron_3_0_chr10_44166851_r      | 44166850  | 3075   | PRDM1      | 23.89968816 | 10 | 5  | 1.4287E-20 | 2.54114E-20 |
| NM_177782 intron_32_0_chr2_166438761_r     | 166438760 | 4573   | PREX1      | 23.16967074 | 5  | 3  | 9.9499E-26 | 2.76614E-25 |
| NM_008923 intron_4_0_chr5_139526771_r      | 139526770 | 11738  | PRKAR1B    | 27.5400957  | 5  | 4  | 3.1591E-15 | 4.12509E-15 |
| NM_001253890 intron_4_0_chr5_139526771_r   | 139526770 | 11738  | PRKAR1B    | 27.5400957  | 5  | 4  | 3.1591E-15 | 4.12509E-15 |
| NM_172661 intron_0_0_chr2_32006812_f       | 32006811  | 31167  | PRRC2B     | 41.20768364 | 8  | 8  | 4.529E-36  | 3.30266E-34 |
| NM_001159634 intron_0_0_chr2_32006812_f    | 32006811  | 31167  | PRRC2B     | 41.20768364 | 8  | 8  | 4.529E-36  | 3.30266E-34 |
| NM_011201 up_5000_chr2_167752827_f         | 167752826 | 5001   | PTPN1      | 46.91433422 | 6  | 6  | 1.2019E-34 | 2.79499E-33 |
| NM_177375 cds_7_0_chr17_24669157_r         | 24669156  | 112    | RAB26      | 32.30855714 | 7  | 6  | 4.1732E-35 | 1.88392E-33 |
| NM_177375 intron_6_0_chr17_24667773_r      | 24667772  | 1385   | RAB26      | 32.30855714 | 7  | 6  | 4.1732E-35 | 1.88392E-33 |
| NM_001166399 cds_3_0_chr8_73281037_f       | 73281036  | 126    | RAB3A      | 23.10455081 | 6  | 3  | 1.8692E-24 | 4.6878E-24  |
| NM_009001 cds_3_0_chr8_73281037_f          | 73281036  | 126    | RAB3A      | 23.10455081 | 6  | 3  | 1.8692E-24 | 4.6878E-24  |
| NM_001166399 intron_2_0_chr8_73280465_f    | 73280464  | 573    | RAB3A      | 23.10455081 | 6  | 3  | 1.8692E-24 | 4.6878E-24  |
| NM_009001 intron_2_0_chr8_73280465_f       | 73280464  | 573    | RAB3A      | 23.10455081 | 6  | 3  | 1.8692E-24 | 4.6878E-24  |
| NM_009014 intron_6_0_chr12_80428392_f      | 80428391  | 330420 | RAD51B     | 46.63149098 | 5  | 5  | 2.5095E-33 | 3.21486E-32 |

|                                            |           |        |         |             |    |   |            |             |
|--------------------------------------------|-----------|--------|---------|-------------|----|---|------------|-------------|
| NM_009014_intron_6_0_chr12_80428392_f      | 80428391  | 330420 | RAD51B  | 43.07937632 | 6  | 6 | 1.2088E-34 | 2.79499E-33 |
| NM_001252562_intron_6_0_chr12_80428392_f   | 80428391  | 180305 | RAD51B  | 46.63149098 | 5  | 5 | 2.5095E-33 | 3.21486E-32 |
| NM_175211_intron_11_0_chr2_33030069_r      | 33030068  | 85930  | RALGPS1 | 34.03611536 | 5  | 5 | 2.2932E-33 | 3.21486E-32 |
| NM_011267_utr3_4_0_chr1_155590986_f        | 155590985 | 1614   | RGS16   | 25.95462807 | 5  | 4 | 2.4987E-33 | 3.21486E-32 |
| NM_172572_intron_17_0_chr11_116471794_r    | 116471793 | 16252  | RHBDF2  | 39.53606838 | 7  | 5 | 1.2364E-27 | 4.17112E-27 |
| NM_001167680_intron_17_0_chr11_116471794_r | 116471793 | 13699  | RHBDF2  | 39.53606838 | 7  | 5 | 1.2364E-27 | 4.17112E-27 |
| NM_011882_up_5000_chr1_155591556_f         | 155591555 | 5001   | RNASEL  | 25.95462807 | 5  | 4 | 2.4987E-33 | 3.21486E-32 |
| NM_133933_cds_6_0_chr6_88050623_f          | 88050622  | 140    | RPN1    | 20.27949241 | 10 | 4 | 2.6835E-15 | 3.52352E-15 |
| NM_028244_cds_10_0_chr17_32192050_f        | 32192049  | 21     | RRP1B   | 27.2405407  | 7  | 4 | 8.1668E-22 | 1.60959E-21 |
| NM_001163734_cds_7_0_chr17_32192050_f      | 32192049  | 21     | RRP1B   | 27.2405407  | 7  | 4 | 8.1668E-22 | 1.60959E-21 |
| NM_028244_intron_9_0_chr17_32190900_f      | 32190899  | 1151   | RRP1B   | 27.2405407  | 7  | 4 | 8.1668E-22 | 1.60959E-21 |
| NM_028244_intron_10_0_chr17_32192070_f     | 32192069  | 787    | RRP1B   | 27.2405407  | 7  | 4 | 8.1668E-22 | 1.60959E-21 |
| NM_001163734_intron_6_0_chr17_32190900_f   | 32190899  | 1151   | RRP1B   | 27.2405407  | 7  | 4 | 8.1668E-22 | 1.60959E-21 |
| NM_001163734_intron_7_0_chr17_32192070_f   | 32192069  | 787    | RRP1B   | 27.2405407  | 7  | 4 | 8.1668E-22 | 1.60959E-21 |
| NM_025290_up_5000_chr17_31414302_r         | 31414301  | 5001   | RSPH1   | 31.71783439 | 5  | 4 | 5.6674E-19 | 9.16847E-19 |
| NM_019732_cds_2_0_chr4_134711197_f         | 134711196 | 158    | RUNX3   | 31.23313249 | 14 | 7 | 3.101E-26  | 9.12953E-26 |
| NM_019732_intron_2_0_chr4_134711354_f      | 134711353 | 7793   | RUNX3   | 31.23313249 | 14 | 7 | 3.101E-26  | 9.12953E-26 |
| NM_019732_intron_2_0_chr4_134711354_f      | 134711353 | 7793   | RUNX3   | 41.28871469 | 7  | 7 | 1.6362E-35 | 8.19509E-34 |
| NM_001205083_intron_4_0_chr5_125774535_r   | 125774534 | 3062   | SCARB1  | 44.98867954 | 6  | 6 | 1.2088E-34 | 2.79499E-33 |
| NM_001205082_intron_5_0_chr5_125774535_r   | 125774534 | 3062   | SCARB1  | 44.98867954 | 6  | 6 | 1.2088E-34 | 2.79499E-33 |
| NM_016741_intron_6_0_chr5_125774535_r      | 125774534 | 3062   | SCARB1  | 44.98867954 | 6  | 6 | 1.2088E-34 | 2.79499E-33 |
| NM_020052_intron_19_0_chr7_117001161_r     | 117001160 | 6459   | SCUBE2  | 33.65747876 | 5  | 5 | 2.5095E-33 | 3.21486E-32 |
| NM_011352_cds_3_0_chr9_57802332_f          | 57802331  | 94     | SEMA7A  | 39.02742474 | 11 | 9 | 1.3637E-34 | 3.07804E-33 |
| NM_011352_cds_4_0_chr9_57802631_f          | 57802630  | 89     | SEMA7A  | 39.02742474 | 11 | 9 | 1.3637E-34 | 3.07804E-33 |
| NM_011352_cds_5_0_chr9_57802867_f          | 57802866  | 112    | SEMA7A  | 39.02742474 | 11 | 9 | 1.3637E-34 | 3.07804E-33 |
| NM_011352_intron_3_0_chr9_57802425_f       | 57802424  | 207    | SEMA7A  | 39.02742474 | 11 | 9 | 1.3637E-34 | 3.07804E-33 |
| NM_011352_intron_4_0_chr9_57802719_f       | 57802718  | 149    | SEMA7A  | 39.02742474 | 11 | 9 | 1.3637E-34 | 3.07804E-33 |
| NM_026175_cds_10_0_chr11_4076484_f         | 4076483   | 247    | SF3A1   | 27.79549337 | 5  | 3 | 2.5896E-12 | 3.00116E-12 |
| NM_144539_intron_5_0_chr1_173571399_r      | 173571398 | 7606   | SLAMF7  | 25.71210301 | 5  | 3 | 8.5133E-29 | 4.18166E-28 |
| NM_009201_intron_0_0_chr7_17367825_f       | 17367824  | 3201   | SLC1A5  | 33.25915385 | 7  | 6 | 3.7843E-32 | 3.98609E-31 |
| NM_009320_intron_0_0_chr6_91634303_f       | 91634302  | 14681  | SLC6A6  | 24.38213876 | 5  | 4 | 3.8823E-26 | 1.11868E-25 |
| NM_007513_intron_11_0_chr5_149176828_r     | 149176827 | 34478  | SLC7A1  | 31.16304727 | 5  | 3 | 8.4498E-15 | 1.07378E-14 |



|                                          |           |       |         |             |    |    |            |             |
|------------------------------------------|-----------|-------|---------|-------------|----|----|------------|-------------|
| NR_028540_up_5000_chr2_166885793_f       | 166885792 | 5001  | SNORD12 | 35.92695283 | 10 | 10 | 1.162E-27  | 3.94838E-27 |
| NM_175407_intron_0_0_chr10_42724221_r    | 42724220  | 16568 | SOBP    | 23.57454272 | 9  | 4  | 2.7325E-16 | 3.78716E-16 |
| NM_175407_utr3_0_0_chr10_42722306_r      | 42722305  | 1916  | SOBP    | 23.57454272 | 9  | 4  | 2.7325E-16 | 3.78716E-16 |
| NM_013673_intron_10_0_chr1_87577715_f    | 87577714  | 10836 | SP100   | 37.42051483 | 5  | 5  | 4.2967E-27 | 1.33549E-26 |
| NM_001109909_up_5000_chr5_137748903_r    | 137748902 | 5001  | SRRT    | 34.18134386 | 5  | 5  | 1.9722E-31 | 1.60058E-30 |
| NM_031405_up_5000_chr5_137748903_r       | 137748902 | 5001  | SRRT    | 34.18134386 | 5  | 5  | 1.9722E-31 | 1.60058E-30 |
| NM_001109910_up_5000_chr5_137748903_r    | 137748902 | 5001  | SRRT    | 34.18134386 | 5  | 5  | 1.9722E-31 | 1.60058E-30 |
| NM_011176_cds_1_0_chr9_30897987_r        | 30897986  | 138   | ST14    | 25.29664668 | 5  | 3  | 4.3525E-16 | 5.95403E-16 |
| NM_011176_intron_0_0_chr9_30897613_r     | 30897612  | 375   | ST14    | 25.29664668 | 5  | 3  | 4.3525E-16 | 5.95403E-16 |
| NM_011176_intron_1_0_chr9_30898124_r     | 30898123  | 799   | ST14    | 25.29664668 | 5  | 3  | 4.3525E-16 | 5.95403E-16 |
| NM_009176_intron_8_0_chr4_117704488_r    | 117704487 | 22768 | ST3GAL3 | 29.46631966 | 5  | 3  | 1.264E-27  | 4.24904E-27 |
| NM_001161774_intron_8_0_chr4_117704488_r | 117704487 | 22768 | ST3GAL3 | 29.46631966 | 5  | 3  | 1.264E-27  | 4.24904E-27 |
| NM_001005510_intron_0_0_chr12_76919466_f | 76919465  | 35543 | SYNE2   | 21.07614517 | 8  | 3  | 1.3193E-16 | 1.84742E-16 |
| NM_031395_intron_6_0_chr17_6910368_f     | 6910367   | 3079  | SYTL3   | 27.20988035 | 5  | 3  | 2.2863E-14 | 2.85558E-14 |
| NM_183368_intron_0_0_chr17_6910368_f     | 6910367   | 3079  | SYTL3   | 27.20988035 | 5  | 3  | 2.2863E-14 | 2.85558E-14 |
| NM_183370_intron_4_0_chr17_6910368_f     | 6910367   | 3079  | SYTL3   | 27.20988035 | 5  | 3  | 2.2863E-14 | 2.85558E-14 |
| NM_198100_cds_4_0_chr11_97007769_r       | 97007768  | 177   | TBKBP1  | 27.18294875 | 13 | 7  | 4.5682E-30 | 2.62462E-29 |
| NM_198100_intron_4_0_chr11_97007945_r    | 97007944  | 743   | TBKBP1  | 27.18294875 | 13 | 7  | 4.5682E-30 | 2.62462E-29 |
| NM_019507_intron_4_0_chr11_96963413_r    | 96963412  | 12552 | TBX21   | 24.63445689 | 8  | 3  | 4.4854E-22 | 8.95192E-22 |
| NM_019507_up_5000_chr11_96976646_r       | 96976645  | 5001  | TBX21   | 20.80916926 | 12 | 5  | 1.2119E-24 | 3.08014E-24 |
| NM_001039153_intron_3_0_chr5_122696635_r | 122696634 | 907   | TCTN1   | 35.81025735 | 7  | 6  | 1.5917E-35 | 8.19509E-34 |
| NM_026486_intron_12_0_chr5_125070235_f   | 125070234 | 2782  | TCTN2   | 32.12924115 | 5  | 5  | 2.5095E-33 | 3.21486E-32 |
| NM_173396_intron_0_0_chr2_156665975_f    | 156665974 | 3918  | TGIF2   | 25.90833286 | 9  | 5  | 7.5565E-32 | 7.54054E-31 |
| NM_009373_intron_9_0_chr2_157960106_r    | 157960105 | 4338  | TGM2    | 20.15759722 | 9  | 3  | 6.8153E-13 | 8.10654E-13 |
| NM_001122998_intron_0_0_chr17_3326727_f  | 3326726   | 85906 | TIAM2   | 24.57057763 | 6  | 3  | 1.7284E-20 | 3.05118E-20 |
| NM_025667_cds_4_0_chr4_132826878_r       | 132826877 | 86    | TMEM222 | 27.2243301  | 6  | 4  | 7.5474E-17 | 1.08362E-16 |
| NM_025667_intron_3_0_chr4_132825725_r    | 132825724 | 1154  | TMEM222 | 27.2243301  | 6  | 4  | 7.5474E-17 | 1.08362E-16 |
| NM_025667_intron_4_0_chr4_132826963_r    | 132826962 | 6484  | TMEM222 | 27.2243301  | 6  | 4  | 7.5474E-17 | 1.08362E-16 |
| NM_011612_intron_0_0_chr4_150294370_f    | 150294369 | 9561  | TNFRSF9 | 33.33750065 | 5  | 4  | 4.2851E-27 | 1.33549E-26 |
| NM_001077508_intron_0_0_chr4_150294370_f | 150294369 | 9561  | TNFRSF9 | 33.33750065 | 5  | 4  | 4.2851E-27 | 1.33549E-26 |
| NM_001077509_up_5000_chr4_150297108_f    | 150297107 | 5001  | TNFRSF9 | 33.33750065 | 5  | 4  | 4.2851E-27 | 1.33549E-26 |
| NM_178242_intron_11_0_chr5_143538485_r   | 143538484 | 10329 | TNRC18  | 30.0593329  | 6  | 4  | 6.2464E-25 | 1.63579E-24 |

|                                           |           |        |         |             |    |    |            |             |
|-------------------------------------------|-----------|--------|---------|-------------|----|----|------------|-------------|
| NM_001122730_intron_14_0_chr5_143538485_r | 143538484 | 10329  | TNRC18  | 30.0593329  | 6  | 4  | 6.2464E-25 | 1.63579E-24 |
| NM_153792_up_5000_chr17_24664884_r        | 24664883  | 5001   | TRAF7   | 32.30855714 | 7  | 6  | 4.1732E-35 | 1.88392E-33 |
| NM_001172113_up_5000_chr17_24664884_r     | 24664883  | 5001   | TRAF7   | 32.30855714 | 7  | 6  | 4.1732E-35 | 1.88392E-33 |
| NM_001172114_up_5000_chr17_24664884_r     | 24664883  | 5001   | TRAF7   | 32.30855714 | 7  | 6  | 4.1732E-35 | 1.88392E-33 |
| NM_133977_intron_2_0_chr9_103114327_r     | 103114326 | 3197   | TRF     | 26.74884476 | 9  | 5  | 8.8519E-21 | 1.62627E-20 |
| NM_145377_cds_0_0_chr11_48620747_r        | 48620746  | 603    | TRIM41  | 31.44907921 | 7  | 5  | 5.6657E-25 | 1.49198E-24 |
| NM_011639_cds_1_0_chr5_137751513_r        | 137751512 | 122    | TRIP6   | 34.18134386 | 5  | 5  | 1.9722E-31 | 1.60058E-30 |
| NM_011639_intron_0_0_chr5_137751403_r     | 137751402 | 111    | TRIP6   | 34.18134386 | 5  | 5  | 1.9722E-31 | 1.60058E-30 |
| NM_024187_cds_1_0_chr17_31784948_r        | 31784947  | 94     | U2AF1   | 34.81961267 | 5  | 4  | 5.1342E-31 | 3.28865E-30 |
| NM_001163769_cds_1_0_chr17_31784948_r     | 31784947  | 94     | U2AF1   | 34.81961267 | 5  | 4  | 5.1342E-31 | 3.28865E-30 |
| NM_024187_intron_0_0_chr17_31784301_r     | 31784300  | 648    | U2AF1   | 34.81961267 | 5  | 4  | 5.1342E-31 | 3.28865E-30 |
| NM_001163769_intron_0_0_chr17_31784301_r  | 31784300  | 648    | U2AF1   | 34.81961267 | 5  | 4  | 5.1342E-31 | 3.28865E-30 |
| NM_026861_cds_6_0_chr14_122393447_f       | 122393446 | 247    | UBAC2   | 29.88544374 | 6  | 5  | 2.7898E-34 | 6.01084E-33 |
| NM_026861_intron_6_0_chr14_122393693_f    | 122393692 | 14321  | UBAC2   | 29.88544374 | 6  | 5  | 2.7898E-34 | 6.01084E-33 |
| NM_001112721_intron_57_0_chr15_37977905_r | 37977904  | 30215  | UBR5    | 27.3911779  | 6  | 4  | 1.0073E-19 | 1.69614E-19 |
| NM_001081359_intron_57_0_chr15_37977905_r | 37977904  | 30215  | UBR5    | 27.3911779  | 6  | 4  | 1.0073E-19 | 1.69614E-19 |
| NM_009464_intron_1_0_chr7_107628102_f     | 107628101 | 494    | UCP3    | 26.42931536 | 6  | 4  | 2.638E-24  | 6.52951E-24 |
| NM_175352_intron_0_0_chr5_115575510_r     | 115575509 | 1511   | UNC119B | 22.52303423 | 6  | 3  | 6.6988E-17 | 9.66582E-17 |
| NM_146168_intron_2_0_chr6_57724783_r      | 57724782  | 15189  | VOPP1   | 25.02291617 | 5  | 3  | 3.2158E-21 | 6.14641E-21 |
| NM_016862_intron_6_0_chr19_55573795_f     | 55573794  | 124513 | VTI1A   | 36.50183786 | 6  | 6  | 2.7593E-24 | 6.7707E-24  |
| NM_172864_cds_8_0_chr3_145726245_r        | 145726244 | 203    | WDR63   | 24.8758141  | 11 | 5  | 4.1096E-14 | 5.09269E-14 |
| NM_172864_intron_8_0_chr3_145726447_r     | 145726446 | 1849   | WDR63   | 24.8758141  | 11 | 5  | 4.1096E-14 | 5.09269E-14 |
| NM_153138_intron_6_0_chr2_73285995_r      | 73285994  | 81390  | WIPF1   | 39.7443956  | 9  | 9  | 2.083E-36  | 3.30266E-34 |
| NM_028816_intron_22_0_chr7_133317763_r    | 133317762 | 25651  | XPO6    | 38.55019552 | 5  | 5  | 2.5095E-33 | 3.21486E-32 |
| NM_198886_cds_1_0_chr17_35032186_f        | 35032185  | 1381   | ZBTB12  | 25.35466925 | 30 | 14 | 1.0573E-16 | 1.49594E-16 |
| NM_198886_utr3_1_0_chr17_35033566_f       | 35033565  | 225    | ZBTB12  | 25.35466925 | 30 | 14 | 1.0573E-16 | 1.49594E-16 |
| NM_172785_cds_1_0_chr10_7559633_f         | 7559632   | 315    | ZC3H12D | 20.8649361  | 11 | 6  | 1.4971E-09 | 1.60727E-09 |
| NM_172785_intron_0_0_chr10_7552361_f      | 7552360   | 7203   | ZC3H12D | 20.8649361  | 11 | 6  | 1.4971E-09 | 1.60727E-09 |
| NM_172785_utr5_1_0_chr10_7559563_f        | 7559562   | 71     | ZC3H12D | 20.8649361  | 11 | 6  | 1.4971E-09 | 1.60727E-09 |
| NM_001017968_cds_5_0_chr4_133171095_r     | 133171094 | 151    | ZDHHC18 | 39.48161928 | 5  | 5  | 2.5095E-33 | 3.21486E-32 |
| NM_001017968_intron_4_0_chr4_133169854_r  | 133169853 | 1242   | ZDHHC18 | 39.48161928 | 5  | 5  | 2.5095E-33 | 3.21486E-32 |
| NM_153802_cds_3_0_chr7_13475345_f         | 13475344  | 1431   | ZFP128  | 40.06710514 | 5  | 5  | 2.2966E-33 | 3.21486E-32 |

|                                           |           |      |        |             |    |    |            |             |
|-------------------------------------------|-----------|------|--------|-------------|----|----|------------|-------------|
| NM_029888_cds_2_0_chr1_74616253_r         | 74616252  | 2906 | ZFP142 | 46.31074542 | 8  | 7  | 1.9094E-31 | 1.60058E-30 |
| NM_183149_cds_9_0_chr17_24817569_f        | 24817568  | 176  | ZFP598 | 22.56197207 | 7  | 4  | 2.874E-15  | 3.76313E-15 |
| NM_183149_cds_10_0_chr17_24817826_f       | 24817825  | 152  | ZFP598 | 22.56197207 | 7  | 4  | 2.874E-15  | 3.76313E-15 |
| NM_183149_intron_9_0_chr17_24817744_f     | 24817743  | 83   | ZFP598 | 22.56197207 | 7  | 4  | 2.874E-15  | 3.76313E-15 |
| NM_001033196_cds_12_0_chr2_166885532_r    | 166885531 | 62   | ZNFX1  | 35.92695283 | 10 | 10 | 1.162E-27  | 3.94838E-27 |
| NM_001033196_intron_11_0_chr2_166882442_r | 166882441 | 3091 | ZNFX1  | 35.92695283 | 10 | 10 | 1.162E-27  | 3.94838E-27 |
| NM_001033196_intron_12_0_chr2_166885643_r | 166885642 | 2368 | ZNFX1  | 35.92695283 | 10 | 10 | 1.162E-27  | 3.94838E-27 |
| NM_001033196_utr5_12_0_chr2_166885593_r   | 166885592 | 51   | ZNFX1  | 35.92695283 | 10 | 10 | 1.162E-27  | 3.94838E-27 |
